# Supplementary material for: The Impact of Water Resources Tax Policy on Water Saving Behavior
Source: MDPI journal article supplement (doi:10.3390/w15050916), 2023-02-28
Supplement: s1 [file s1]

## Supplementary Materiel

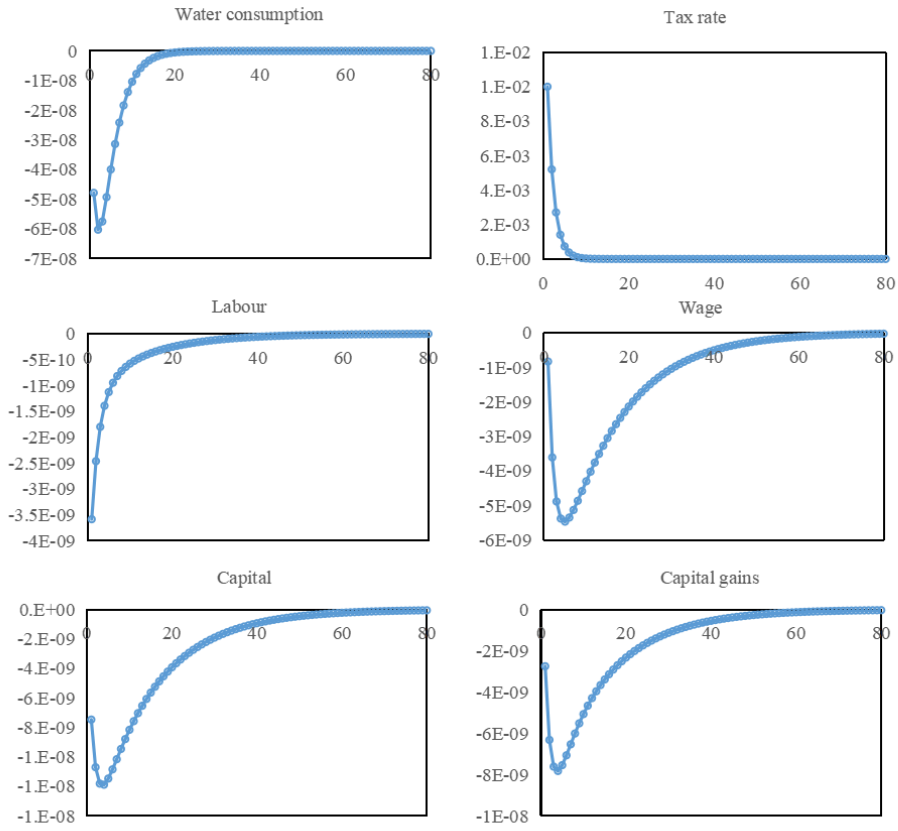

Figure S1. Responses of enterprises to water resources tax shocks

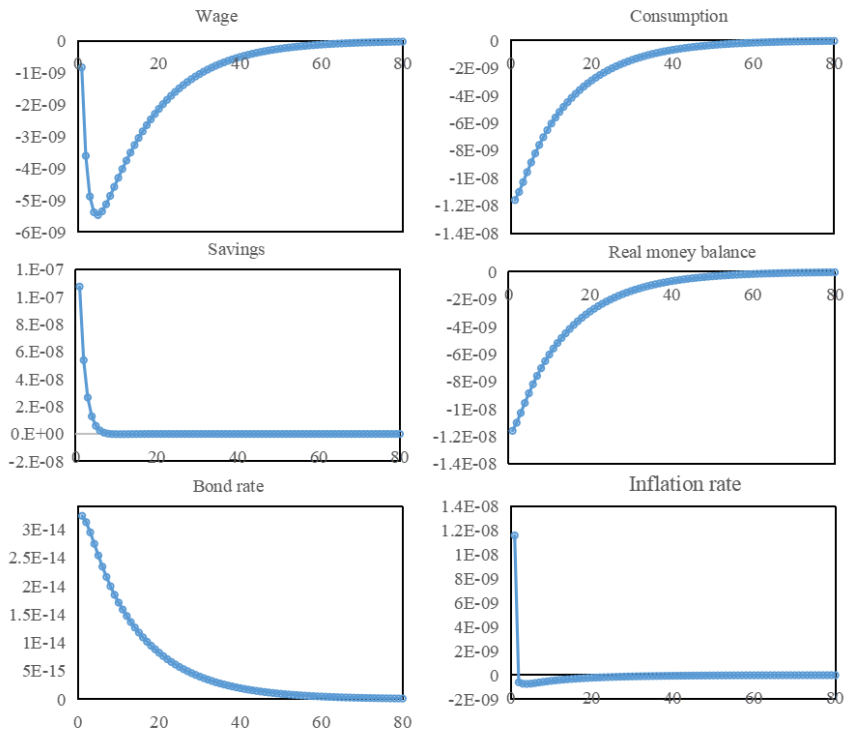

Figure S2. Resident response to the water resources tax shock

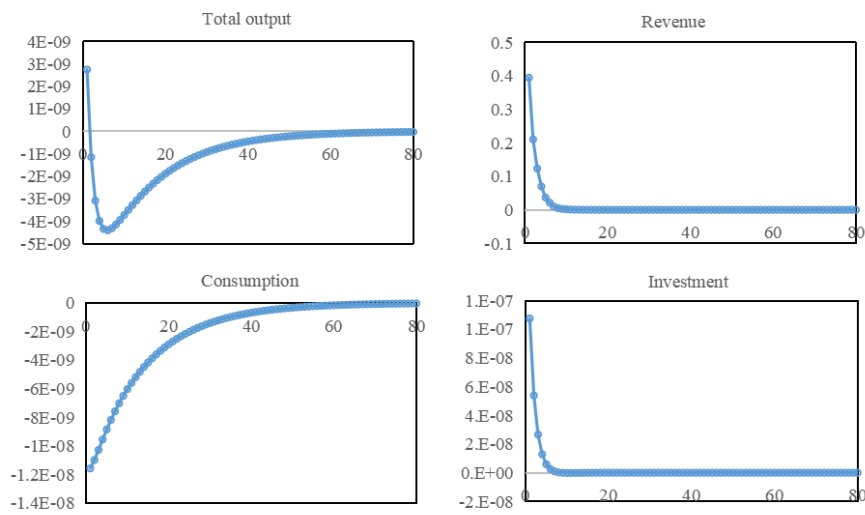

Figure S3. Overall impact of water resources tax on economy and society
